# Supplementary material for: An Embryonic Zebrafish Model to Screen Disruption of Gut-Vascular Barrier upon Exposure to Ambient Ultrafine Particles
Source: MDPI journal article supplement (doi:10.3390/toxics8040107), 2020-11-19
Supplement: s1 [file s1]

## Supplementary Materials: An Embryonic Zebrafish Model to Screen Disruption of Gut-Vascular Barriers upon Exposure to Ambient Ultrafine Particles

Kyung In Baek, Yi Qian, Chih-Chiang Chang, Ryan O'Donnell, Ehsan Soleimanian, Constantinos Sioutas, Rongsong Li and Tzung K. Hsiai

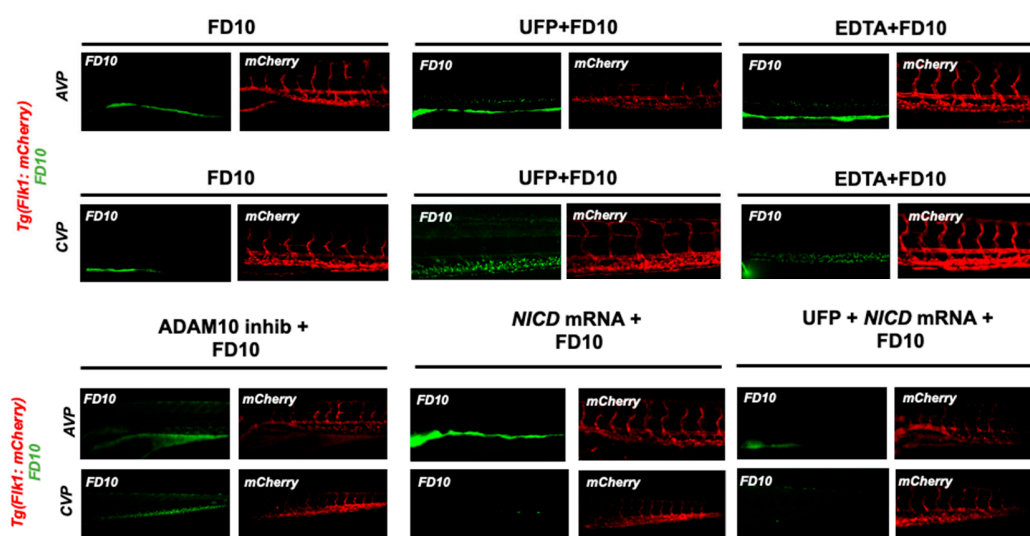

**Figure S1.** Imaging endoluminal distribution of FD10. Images of FD10 (green) and vascular endothelium (*flk1*<sup>+</sup>, red) were taken respectively in response to UFP, Adam10 inhibitor, and *NICD* mRNA rescue and superimposed to assess vascular endothelial distribution of FD10.
